# Supplementary material for: Lasting Immunological Imprint of Primary Epstein-Barr Virus Infection With Associations to Chronic Low-Grade Inflammation and Fatigue
Source: PubMed Central journal article supplement (PMC8721200; doi:10.3389/fimmu.2021.715102), 2021-12-20
Supplement: DataSheet_1.pdf [file DataSheet_1.pdf]

**Table S1.** Supernatant levels of cytokines in cell cultures of PBMC from healthy controls (HC) and EBV-patients (EBV) at baseline.

| Baseline 2 grp |          |          |                    |                       |                       |       |
|----------------|----------|----------|--------------------|-----------------------|-----------------------|-------|
| TNF            | Stimuli  | Receptor | Target cell        | HC                    | EBV                   | p     |
|                | Unstim   |          | All                | 37 (8 - 176)          | 88 (38 - 207)         | 0,330 |
|                | PHA      | TCR      | T-cell             | 17025 (11322 - 25602) | 38392 (30772 - 47900) | 0,001 |
|                | PWM      |          | B-cell             | 23635 (18161 - 30758) | 28166 (24416 - 32492) | 0,248 |
|                | Isop.    | β-AR     | T-cell             | 44 (9 - 223)          | 95 (39 - 229)         | 0,410 |
|                | P3cys    | TLR1/2   | Monocyte, (B-cell) | 753 (357 - 1591)      | 1462 (974 - 2192)     | 0,125 |
|                | Poly I:C | TLR3     | T-cell             | 35 (8 - 157)          | 87 (38 - 196)         | 0,295 |
|                | LPS      | TLR4     | Monocyte           | 7442 (5064 - 10937)   | 11093 (9003 - 13668)  | 0,074 |
|                | ORN      | TLR7     | Monocyte, (B-cell) | 190 (67 - 543)        | 313 (177 - 552)       | 0,410 |
|                | ODN      | TLR9     | B-cell             | 223 (70 - 709)        | 216 (115 - 404)       | 0,961 |
|                | EBV      | TCR/BCR  | T-cell, B-cell     | 62 (16 - 241)         | 90 (43 - 189)         | 0,628 |
| IFN            | Stimuli  | Receptor | Target cell        |                       |                       |       |
|                | Unstim   |          | All                | 6 (3 - 13)            | 8 (5 - 11)            | 0,589 |
|                | PHA      | TCR      | T-cell             | 355 (223 - 564)       | 1200 (933 - 1544)     | 0,000 |
|                | PWM      |          | B-cell             | 259 (165 - 408)       | 369 (289 - 472)       | 0,176 |
|                | Isop.    | β-AR     | T-cell             | 8 (4 - 18)            | 8 (5 - 12)            | 0,936 |
|                | P3cys    | TLR1/2   | Monocyte, (B-cell) | 35 (24 - 49)          | 33 (27 - 40)          | 0,798 |
|                | Poly I:C | TLR3     | T-cell             | 8 (4 - 16)            | 9 (6 - 13)            | 0,805 |
|                | LPS      | TLR4     | Monocyte           | 36 (26 - 48)          | 30 (26 - 35)          | 0,330 |
|                | ORN      | TLR7     | Monocyte, (B-cell) | 16 (10 - 25)          | 18 (14 - 23)          | 0,618 |
|                | ODN      | TLR9     | B-cell             | 31 (16 - 63)          | 21 (15 - 31)          | 0,343 |
|                | EBV      | TCR/BCR  | T-cell, B-cell     | 12 (7 - 23)           | 12 (9 - 17)           | 0,935 |
| IL-1β          | Stimuli  | Receptor | Target cell        |                       |                       |       |
|                | Unstim   |          | All                | 11 (3 - 37)           | 11 (6 - 21)           | 0,989 |
|                | PHA      | TCR      | T-cell             | 513 (334 - 789)       | 1253 (992 - 1581)     | 0,000 |
|                | PWM      |          | B-cell             | 3268 (2696 - 3961)    | 4825 (4347 - 5355)    | 0,001 |
|                | Isop.    | β-AR     | T-cell             | 12 (4 - 38)           | 12 (6 - 22)           | 0,999 |
|                | P3cys    | TLR1/2   | Monocyte, (B-cell) | 11 (4 - 34)           | 28 (15 - 50)          | 0,158 |
|                | Poly I:C | TLR3     | T-cell             | 7 (2 - 23)            | 11 (6 - 21)           | 0,495 |
|                | LPS      | TLR4     | Monocyte           | 655 (438 - 979)       | 1292 (1039 - 1607)    | 0,004 |
|                | ORN      | TLR7     | Monocyte, (B-cell) | 4 (1 - 15)            | 13 (7 - 25)           | 0,138 |
|                | ODN      | TLR9     | B-cell             | 9 (2 - 31)            | 13 (7 - 27)           | 0,557 |
|                | EBV      | TCR/BCR  | T-cell, B-cell     | 8 (2 - 26)            | 13 (7 - 25)           | 0,464 |
| IL-1RA         | Stimuli  | Receptor | Target cell        |                       |                       |       |
|                | Unstim   |          | All                | 116 (49 - 277)        | 158 (98 - 253)        | 0,541 |
|                | PHA      | TCR      | T-cell             | 3989 (3234 - 4922)    | 3490 (3114 - 3911)    | 0,269 |
|                | PWM      |          | B-cell             | 4473 (3309 - 6044)    | 2720 (2310 - 3203)    | 0,005 |
|                | Isop.    | β-AR     | T-cell             | 100 (42 - 238)        | 129 (81 - 207)        | 0,608 |
|                | P3cys    | TLR1/2   | Monocyte, (B-cell) | 608 (381 - 971)       | 746 (579 - 962)       | 0,447 |
|                | Poly I:C | TLR3     | T-cell             | 222 (114 - 432)       | 308 (215 - 442)       | 0,391 |
|                | LPS      | TLR4     | Monocyte           | 2923 (2332 - 3665)    | 2415 (2137 - 2730)    | 0,143 |
|                | ORN      | TLR7     | Monocyte, (B-cell) | 3006 (2242 - 4030)    | 2455 (2094 - 2879)    | 0,231 |
|                | ODN      | TLR9     | B-cell             | 1249 (751 - 2077)     | 1321 (1003 - 1741)    | 0,847 |
|                | EBV      | TCR/BCR  | T-cell, B-cell     | 348 (192 - 630)       | 436 (316 - 602)       | 0,508 |
| IL-2           | Stimuli  | Receptor | Target cell        |                       |                       |       |
|                | Unstim   |          | All                | 7 (3 - 14)            | 5 (3 - 8)             | 0,548 |
|                | PHA      | TCR      | T-cell             | 629 (485 - 816)       | 811 (705 - 935)       | 0,091 |
|                | PWM      |          | B-cell             | 799 (642 - 994)       | 783 (696 - 882)       | 0,875 |
|                | Isop.    | β-AR     | T-cell             | 8 (4 - 18)            | 5 (4 - 8)             | 0,314 |
|                | P3cys    | TLR1/2   | Monocyte, (B-cell) | 8 (5 - 16)            | 8 (6 - 11)            | 0,920 |
|                | Poly I:C | TLR3     | T-cell             | 4 (2 - 9)             | 5 (3 - 7)             | 0,777 |
|                | LPS      | TLR4     | Monocyte           | 42 (30 - 57)          | 39 (32 - 46)          | 0,670 |
|                | ORN      | TLR7     | Monocyte, (B-cell) | 5 (3 - 10)            | 6 (4 - 8)             | 0,757 |
|                | ODN      | TLR9     | B-cell             | 5 (2 - 10)            | 5 (3 - 7)             | 0,909 |
|                | EBV      | TCR/BCR  | T-cell, B-cell     | 7 (3 - 13)            | 5 (3 - 7)             | 0,385 |
| IL-6           | Stimuli  | Receptor | Target cell        |                       |                       |       |
|                | Unstim   |          | All                | 11 (3 - 37)           | 12 (6 - 23)           | 0,887 |
|                | PHA      | TCR      | T-cell             | 811 (681 - 966)       | 828 (753 - 911)       | 0,838 |
|                | PWM      |          | B-cell             | 1392 (1165 - 1663)    | 1283 (1165 - 1413)    | 0,427 |
|                | Isop.    | β-AR     | T-cell             | 11 (4 - 34)           | 12 (6 - 21)           | 0,969 |
|                | P3cys    | TLR1/2   | Monocyte, (B-cell) | 211 (127 - 351)       | 361 (274 - 476)       | 0,068 |
|                | Poly I:C | TLR3     | T-cell             | 7 (2 - 23)            | 12 (6 - 24)           | 0,384 |
|                | LPS      | TLR4     | Monocyte           | 1138 (928 - 1395)     | 1141 (1021 - 1274)    | 0,982 |
|                | ORN      | TLR7     | Monocyte, (B-cell) | 5 (2 - 17)            | 14 (8 - 27)           | 0,142 |
|                | ODN      | TLR9     | B-cell             | 10 (3 - 36)           | 15 (8 - 29)           | 0,620 |
|                | EBV      | TCR/BCR  | T-cell, B-cell     | 8 (2 - 27)            | 13 (7 - 25)           | 0,479 |
| IL-8           | Stimuli  | Receptor | Target cell        |                       |                       |       |
|                | Unstim   |          | All                | 1.1 (0.3 - 4.2)       | 1.9 (0.9 - 4)         | 0,461 |
|                | PHA      | TCR      | T-cell             | 69.4 (32.5 - 148.2)   | 48.1 (31.9 - 72.7)    | 0,403 |
|                | PWM      |          | B-cell             | 43.2 (21.2 - 88)      | 63.6 (43.3 - 93.7)    | 0,344 |
|                | Isop.    | β-AR     | T-cell             | 1.9 (0.5 - 7.3)       | 2.7 (1.3 - 5.7)       | 0,632 |
|                | P3cys    | TLR1/2   | Monocyte, (B-cell) | 31.9 (16.4 - 62.1)    | 36.6 (25.5 - 52.4)    | 0,722 |
|                | Poly I:C | TLR3     | T-cell             | 1.2 (0.4 - 3.7)       | 2.5 (1.4 - 4.8)       | 0,239 |
|                | LPS      | TLR4     | Monocyte           | 36.3 (19.1 - 69.1)    | 38.8 (27.4 - 55)      | 0,856 |
|                | ORN      | TLR7     | Monocyte, (B-cell) | 0.3 (0.1 - 1.3)       | 1.6 (0.8 - 3.3)       | 0,045 |
|                | ODN      | TLR9     | B-cell             | 4.6 (1.3 - 16.3)      | 8.2 (4.1 - 16.2)      | 0,427 |
|                | EBV      | TCR/BCR  | T-cell, B-cell     | 4.7 (1.5 - 15.1)      | 6 (3.2 - 11.4)        | 0,706 |
| IL-10          | Stimuli  | Receptor | Target cell        |                       |                       |       |
|                | Unstim   |          | All                | 6 (3 - 13)            | 5 (3 - 8)             | 0,681 |
|                | PHA      | TCR      | T-cell             | 428 (313 - 586)       | 267 (225 - 316)       | 0,010 |
|                | PWM      |          | B-cell             | 917 (618 - 1361)      | 539 (435 - 668)       | 0,021 |
|                | Isop.    | β-AR     | T-cell             | 7 (3 - 16)            | 6 (4 - 10)            | 0,764 |
|                | P3cys    | TLR1/2   | Monocyte, (B-cell) | 17 (9 - 29)           | 25 (19 - 34)          | 0,197 |
|                | Poly I:C | TLR3     | T-cell             | 4 (2 - 9)             | 5 (4 - 8)             | 0,593 |
|                | LPS      | TLR4     | Monocyte           | 446 (345 - 577)       | 468 (407 - 538)       | 0,748 |
|                | ORN      | TLR7     | Monocyte, (B-cell) | 5 (2 - 10)            | 7 (5 - 11)            | 0,381 |
|                | ODN      | TLR9     | B-cell             | 5 (3 - 10)            | 5 (3 - 7)             | 0,654 |
|                | EBV      | TCR/BCR  | T-cell, B-cell     | 5 (2 - 12)            | 6 (4 - 9)             | 0,923 |

Table S1 (cont)

|          |          |          |                    | Baseline 2 grp       |                     |                    |       |
|----------|----------|----------|--------------------|----------------------|---------------------|--------------------|-------|
|          | Stimuli  | Receptor | Target cell        | HC                   | EBV                 | P                  |       |
| MCP-1    | Unstim   |          | All                | 283 (121 - 664)      | 248 (156 - 393)     | 0,784              |       |
|          | PHA      | TCR      | T-cell             | 1086 (924 - 1277)    | 919 (841 - 1003)    | 0,073              |       |
|          | PWM      |          | B-cell             | 4042 (1837 - 8894)   | 1003 (654 - 1538)   | 0,003              |       |
|          | Isop.    | β-AR     | T-cell             | 275 (154 - 492)      | 390 (284 - 535)     | 0,298              |       |
|          | P3cys    | TLR1/2   | Monocyte, (B-cell) | 3581 (1716 - 7473)   | 1807 (1213 - 2693)  | 0,108              |       |
|          | Poly I:C | TLR3     | T-cell             | 817 (409 - 1633)     | 474 (325 - 690)     | 0,173              |       |
|          | LPS      | TLR4     | Monocyte           | 2653 (1506 - 4675)   | 1253 (922 - 1704)   | 0,023              |       |
|          | ORN      | TLR7     | Monocyte, (B-cell) | 4860 (2189 - 10791)  | 2031 (1318 - 3131)  | 0,059              |       |
|          | ODN      | TLR9     | B-cell             | 19466 (4922 - 76990) | 3548 (1683 - 7479)  | 0,033              |       |
|          | EBV      | TCR/BCR  | T-cell, B-cell     | 1044 (557 - 1957)    | 670 (476 - 942)     | 0,221              |       |
|          | IP-10    | Unstim   |                    | All                  | 48 (19 - 121)       | 29 (17 - 47)       | 0,326 |
|          |          | PHA      | TCR                | T-cell               | 4827 (2321 - 10039) | 3613 (2429 - 5374) | 0,491 |
| PWM      |          |          | B-cell             | 1637 (775 - 3458)    | 686 (457 - 1029)    | 0,045              |       |
| Isop.    |          | β-AR     | T-cell             | 42 (17 - 104)        | 14 (8 - 23)         | 0,038              |       |
| P3cys    |          | TLR1/2   | Monocyte, (B-cell) | 28 (13 - 62)         | 15 (10 - 24)        | 0,175              |       |
| Poly I:C |          | TLR3     | T-cell             | 569 (218 - 1485)     | 114 (68 - 193)      | 0,004              |       |
| LPS      |          | TLR4     | Monocyte           | 31 (15 - 68)         | 12 (8 - 17)         | 0,024              |       |
| ORN      |          | TLR7     | Monocyte, (B-cell) | 11879 (3877 - 36397) | 2571 (1401 - 4719)  | 0,019              |       |
| ODN      |          | TLR9     | B-cell             | 1348 (538 - 3377)    | 131 (80 - 216)      | 0,000              |       |
| EBV      |          | TCR/BCR  | T-cell, B-cell     | 1195 (419 - 3407)    | 95 (54 - 167)       | 0,000              |       |
| MIP-1α   |          | Unstim   |                    | All                  | 11 (4 - 36)         | 14 (8 - 27)        | 0,721 |
|          |          | PHA      | TCR                | T-cell               | 892 (798 - 997)     | 810 (763 - 861)    | 0,136 |
|          | PWM      |          | B-cell             | 1056 (903 - 1234)    | 795 (730 - 865)     | 0,002              |       |
|          | Isop.    | β-AR     | T-cell             | 12 (4 - 41)          | 18 (9 - 34)         | 0,608              |       |
|          | P3cys    | TLR1/2   | Monocyte, (B-cell) | 305 (210 - 443)      | 540 (441 - 661)     | 0,009              |       |
|          | Poly I:C | TLR3     | T-cell             | 7 (2 - 21)           | 14 (7 - 26)         | 0,277              |       |
|          | LPS      | TLR4     | Monocyte           | 839 (744 - 947)      | 780 (730 - 832)     | 0,289              |       |
|          | ORN      | TLR7     | Monocyte, (B-cell) | 20 (8 - 48)          | 37 (23 - 59)        | 0,226              |       |
|          | ODN      | TLR9     | B-cell             | 17 (6 - 49)          | 22 (13 - 39)        | 0,658              |       |
|          | EBV      | TCR/BCR  | T-cell, B-cell     | 9 (3 - 29)           | 15 (8 - 28)         | 0,472              |       |
|          | MIP-1β   | Unstim   |                    | All                  | 0.06 (0.02 - 0.2)   | 0.09 (0.05 - 0.19) | 0,486 |
|          |          | PHA      | TCR                | T-cell               | 266 (74 - 952)      | 360 (180 - 718)    | 0,680 |
| PWM      |          |          | B-cell             | 296 (73 - 1194)      | 91 (42 - 193)       | 0,143              |       |
| Isop.    |          | β-AR     | T-cell             | 0.07 (0.02 - 0.24)   | 0.07 (0.04 - 0.13)  | 0,947              |       |
| P3cys    |          | TLR1/2   | Monocyte, (B-cell) | 1.14 (0.65 - 1.97)   | 2.02 (1.5 - 2.72)   | 0,072              |       |
| Poly I:C |          | TLR3     | T-cell             | 0.05 (0.01 - 0.15)   | 0.12 (0.06 - 0.22)  | 0,171              |       |
| LPS      |          | TLR4     | Monocyte           | 145 (39 - 538)       | 125 (62 - 255)      | 0,843              |       |
| ORN      |          | TLR7     | Monocyte, (B-cell) | 0.3 (0.14 - 0.65)    | 0.47 (0.31 - 0.71)  | 0,328              |       |
| ODN      |          | TLR9     | B-cell             | 0.23 (0.11 - 0.48)   | 0.22 (0.15 - 0.33)  | 0,911              |       |
| EBV      |          | TCR/BCR  | T-cell, B-cell     | 0.05 (0.02 - 0.16)   | 0.12 (0.07 - 0.21)  | 0,219              |       |
| RANTES   |          | Unstim   |                    | All                  | 268 (166 - 435)     | 426 (328 - 554)    | 0,098 |
|          |          | PHA      | TCR                | T-cell               | 4815 (3367 - 6886)  | 6519 (5369 - 7915) | 0,143 |
|          | PWM      |          | B-cell             | 3707 (2577 - 5330)   | 3702 (3040 - 4508)  | 0,995              |       |
|          | Isop.    | β-AR     | T-cell             | 341 (212 - 548)      | 440 (340 - 569)     | 0,351              |       |
|          | P3cys    | TLR1/2   | Monocyte, (B-cell) | 1378 (1055 - 1800)   | 1542 (1334 - 1782)  | 0,464              |       |
|          | Poly I:C | TLR3     | T-cell             | 268 (166 - 432)      | 474 (366 - 614)     | 0,040              |       |
|          | LPS      | TLR4     | Monocyte           | 3949 (2860 - 5453)   | 2818 (2365 - 3357)  | 0,071              |       |
|          | ORN      | TLR7     | Monocyte, (B-cell) | 360 (235 - 552)      | 600 (476 - 756)     | 0,040              |       |
|          | ODN      | TLR9     | B-cell             | 1219 (833 - 1785)    | 1705 (1386 - 2096)  | 0,128              |       |
|          | EBV      | TCR/BCR  | T-cell, B-cell     | 380 (238 - 605)      | 576 (448 - 742)     | 0,121              |       |
|          | MGSF     | Unstim   |                    | All                  | 23 (9 - 58)         | 20 (12 - 33)       | 0,785 |
|          |          | PHA      | TCR                | T-cell               | 890 (705 - 1122)    | 885 (780 - 1003)   | 0,968 |
| PWM      |          |          | B-cell             | 3377 (2465 - 4628)   | 2672 (2253 - 3170)  | 0,197              |       |
| Isop.    |          | β-AR     | T-cell             | 26 (10 - 73)         | 25 (14 - 43)        | 0,918              |       |
| P3cys    |          | TLR1/2   | Monocyte, (B-cell) | 253 (186 - 345)      | 251 (212 - 296)     | 0,959              |       |
| Poly I:C |          | TLR3     | T-cell             | 13 (5 - 31)          | 20 (13 - 32)        | 0,362              |       |
| LPS      |          | TLR4     | Monocyte           | 1383 (1083 - 1766)   | 1552 (1359 - 1772)  | 0,412              |       |
| ORN      |          | TLR7     | Monocyte, (B-cell) | 40 (21 - 78)         | 55 (39 - 79)        | 0,402              |       |
| ODN      |          | TLR9     | B-cell             | 40 (19 - 86)         | 48 (32 - 73)        | 0,670              |       |
| EBV      |          | TCR/BCR  | T-cell, B-cell     | 16 (7 - 38)          | 25 (16 - 40)        | 0,370              |       |
| VEGF     |          | Unstim   |                    | All                  | 62 (40 - 96)        | 72 (57 - 91)       | 0,562 |
|          |          | PHA      | TCR                | T-cell               | 246 (183 - 331)     | 190 (162 - 223)    | 0,131 |
|          | PWM      |          | B-cell             | 354 (288 - 435)      | 254 (227 - 284)     | 0,006              |       |
|          | Isop.    | β-AR     | T-cell             | 62 (40 - 98)         | 72 (56 - 92)        | 0,566              |       |
|          | P3cys    | TLR1/2   | Monocyte, (B-cell) | 74 (42 - 129)        | 64 (47 - 86)        | 0,640              |       |
|          | Poly I:C | TLR3     | T-cell             | 61 (45 - 84)         | 70 (59 - 83)        | 0,466              |       |
|          | LPS      | TLR4     | Monocyte           | 262 (205 - 336)      | 194 (169 - 222)     | 0,037              |       |
|          | ORN      | TLR7     | Monocyte, (B-cell) | 50 (30 - 83)         | 63 (48 - 84)        | 0,407              |       |
|          | ODN      | TLR9     | B-cell             | 60 (38 - 96)         | 72 (56 - 93)        | 0,510              |       |
|          | EBV      | TCR/BCR  | T-cell, B-cell     | 48 (29 - 79)         | 65 (49 - 86)        | 0,287              |       |
